# Supplementary material for: The relationship between maternal dietary behaviors and pregnancy outcomes among postpartum women in Iran: a cross-sectional study
Source: Research Square preprint supplement (doi:10.21203/rs.3.rs-7040765/v1), 2025-08-20
Supplement: Supplementary file 1 [file 5e90ff9d9f8f339ea996a322.docx]

Maternal Nutrition Behavior Questionnaire – Pregnancy Period(1)

Questionnaire Code: _____________________

Interviewer’s Full Name: _____________________

Interview Date: _____________________

# Questions

1. 1. Since becoming pregnant, how has your overall food intake changed compared to before pregnancy?

- ☐ No change
- ☐ Decreased
- ☐ Increased

1. 2. Since becoming pregnant, how has your fruit and vegetable intake changed compared to before pregnancy?

- ☐ No change
- ☐ Decreased
- ☐ Increased

1. 3. On average, how many glasses of milk or yogurt do you consume daily during pregnancy?

- ☐ None
- ☐ Less than three glasses
- ☐ Three or more glasses

1. 4. Do you take folic acid tablets during pregnancy?

- ☐ No
- ☐ Yes – If yes, when did you start? __________

1. 5. Do you take iron tablets during pregnancy?

- ☐ Yes, occasionally
- ☐ Yes, always after the fourth month
- ☐ No

1. 6. Do you take multivitamin tablets during pregnancy?

- ☐ Yes, occasionally
- ☐ Yes, always after the fourth month
- ☐ No

1. 7. If you have experienced nausea or vomiting after taking iron tablets, what did you do?

- ☐ I did not experience nausea or vomiting after taking iron tablets
- ☐ I do not take iron tablets at all
- ☐ I take the tablet after meals or before sleeping
- ☐ I stopped taking the tablet

1. 8. What have you done to prevent constipation?

- ☐ Nothing
- ☐ Increased consumption of fresh fruits and vegetables
- ☐ Increased fluid intake
- ☐ Walking
- ☐ Consulted a doctor and used prescribed medication

1. 9. Have you ever experienced constipation during this pregnancy?

- ☐ Yes
- ☐ No
- ☐ If yes, what did you do?
- ☐ Nothing
- ☐ Increased consumption of fresh fruits and vegetables
- ☐ Increased fluid intake
- ☐ Walking
- ☐ Consulted a doctor and used prescribed medication

1. 10. What have you done to prevent heartburn or acid reflux during pregnancy?

- ☐ Nothing
- ☐ Increased number of meals per day
- ☐ Chewing food thoroughly
- ☐ Eating slowly
- ☐ Avoiding lying down immediately after meals

1. 11. Have you ever experienced heartburn or acid reflux during this pregnancy?

- ☐ Yes
- ☐ No
- ☐ If yes, what did you do?
- ☐ Nothing
- ☐ Increased number of meals per day
- ☐ Chewing food thoroughly
- ☐ Eating slowly
- ☐ Avoiding lying down immediately after meals

1. 12. What have you done to prevent swelling in hands and feet?

- ☐ Nothing
- ☐ Lying on the side 4–5 times per day
- ☐ Avoiding standing for long periods or sitting with feet hanging down

1. 13. Have you experienced swelling in hands and feet during this pregnancy?

- ☐ Yes
- ☐ No
- ☐ If yes, what did you do?
- ☐ Nothing
- ☐ Lying on the side 4–5 times per day
- ☐ Avoiding standing for long periods or sitting with feet hanging down

1. 14. What have you done to prevent anemia during pregnancy?

- ☐ Nothing
- ☐ Reduced tea consumption or changed its timing
- ☐ Consumed vitamin C-rich foods
- ☐ Consumed nuts (almonds, pistachios, walnuts, etc.)
- ☐ Taken iron tablets
- ☐ Consumed iron-rich foods (liver, meat, chicken, fish, legumes, dark green vegetables)

1. 15. What have you done to prevent urinary tract infections during pregnancy?

- ☐ Nothing
- ☐ Avoided consuming irritants (coffee, sausages, processed meats, spicy foods, asparagus, garlic, onion, radish, canned meats)
- ☐ Increased fruit and vegetable intake
- ☐ Consumed urine-acidifying foods (cheese, meat, fish, eggs, rice, bread)
- ☐ Increased daily fluid intake (at least 2 liters)

1. 16. Have you experienced urinary tract infections during this pregnancy?

- ☐ Yes
- ☐ No
- ☐ If yes, what did you do?
- ☐ Nothing
- ☐ Avoided consuming irritants
- ☐ Increased fruit and vegetable intake
- ☐ Consumed urine-acidifying foods
- ☐ Increased daily fluid intake (at least 2 liters)

# Food Group Intake (to be filled by the researcher)

1. 17. How much fruit do you consume daily?

- ☐ None
- ☐ 3–4 servings
- ☐ Less than 3 servings

1. 18. How much vegetables do you consume daily?

- ☐ None
- ☐ 4–5 servings
- ☐ Less than 4 servings

1. 19. How much meat and legumes do you consume daily?

- ☐ None
- ☐ 3 servings
- ☐ Less than 3 servings

1. 20. How much bread and cereals do you consume daily?

- ☐ None
- ☐ 7–11 servings
- ☐ Less than 7–11 servings

1. 21. How much milk and dairy products do you consume daily?

- ☐ None
- ☐ 3–4 servings
- ☐ Less than 3–4 servings

1. Mohammad Alizadeh Charandabi S, Kamali Fard M, Ebrahimi Mamqani M, Asghari Jafarabadi M, Omidi F. Evaluation of the nutritional behavior of women in first trimester of pregnancy and its relationship with some socio-demographic characteristics of whom referred to health centers in Karaj. The Iranian Journal of Obstetrics, Gynecology and Infertility. 2012;15(18):10-8.
